# Supplementary material
Source: PubMed Central journal article supplement (PMC3314454)
Supplement: JCI58743sd.pdf [file JCI58743sd.pdf]

**Supplementary Figure 1.** Gating strategy to identify naïve, IgM memory and IgG memory B cells before rituximab therapy (A) and 12 months after treatment initiation (B). Peripheral blood B cell frequencies from all live cells in the lymphocyte gate and are shown in (C). Panel A and B were generated with data from the same patient.

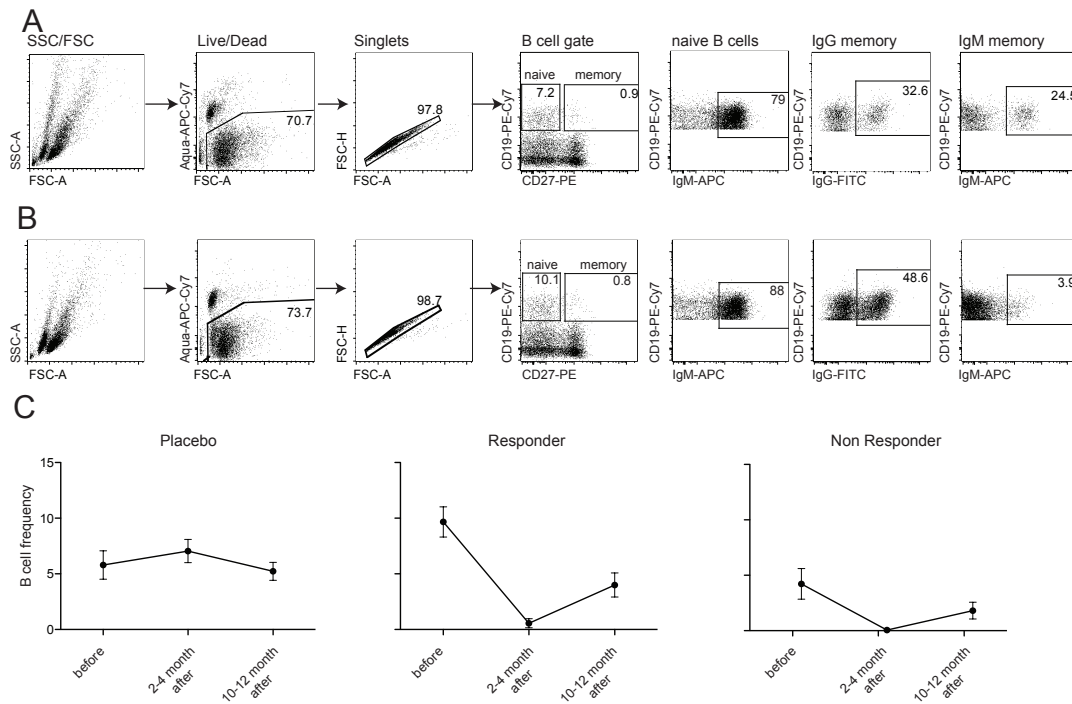

**Supplementary Figure 2.** IgH chain gene variable (V) repertoires in single cell sorted CD19<sup>+</sup>CD27<sup>+</sup>IgM<sup>+</sup>, CD19<sup>+</sup>CD27<sup>-</sup>IgM<sup>+</sup> and CD19<sup>+</sup>CD27<sup>+</sup>IgG<sup>+</sup> B cells, respectively. Samples were analyzed before and 12 months after rituximab and placebo (normal saline solution) therapy. Clonally expanded sequences were counted as one sequence. The numbers in circles indicate the number of individual sequences per patient.

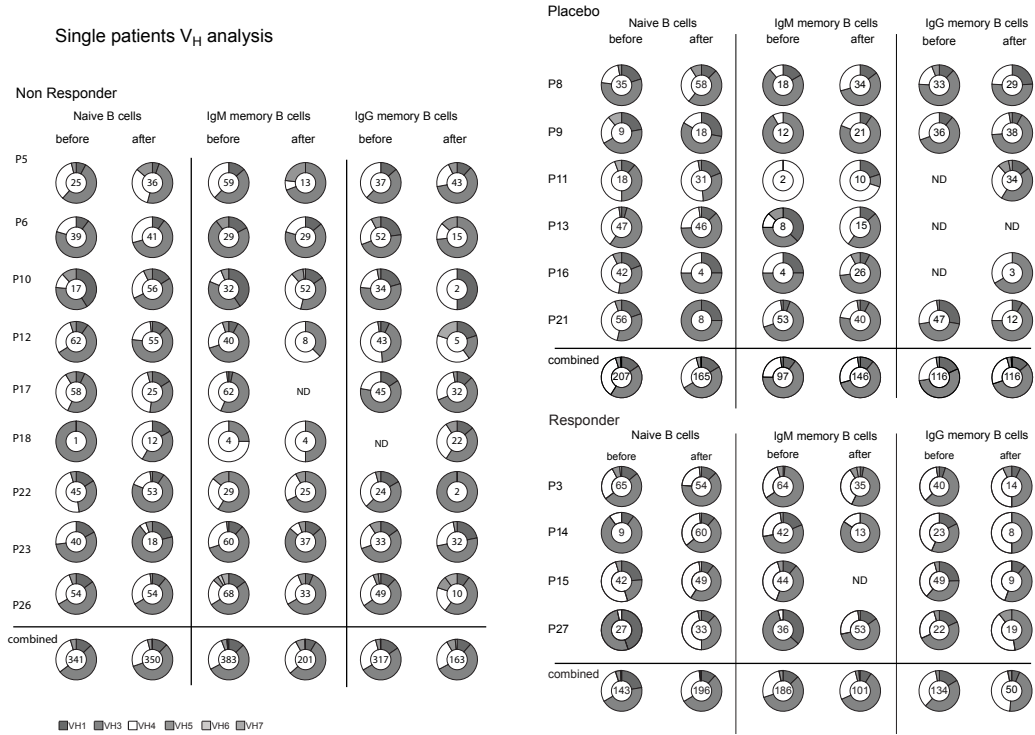

**Supplementary Figure 3.** IgH diversity (D) region repertoires in single cell sorted CD19<sup>+</sup>CD27<sup>-</sup>IgM<sup>+</sup>, CD19<sup>+</sup>CD27<sup>+</sup>IgM<sup>+</sup> and CD19<sup>+</sup>CD27<sup>+</sup>IgG<sup>+</sup> B cells, respectively. Samples were analyzed before and 12 months after rituximab and placebo (normal saline solution) therapy. Clonally expanded sequences were counted as one sequence. The numbers in circles indicate the number of individual sequences per patient.

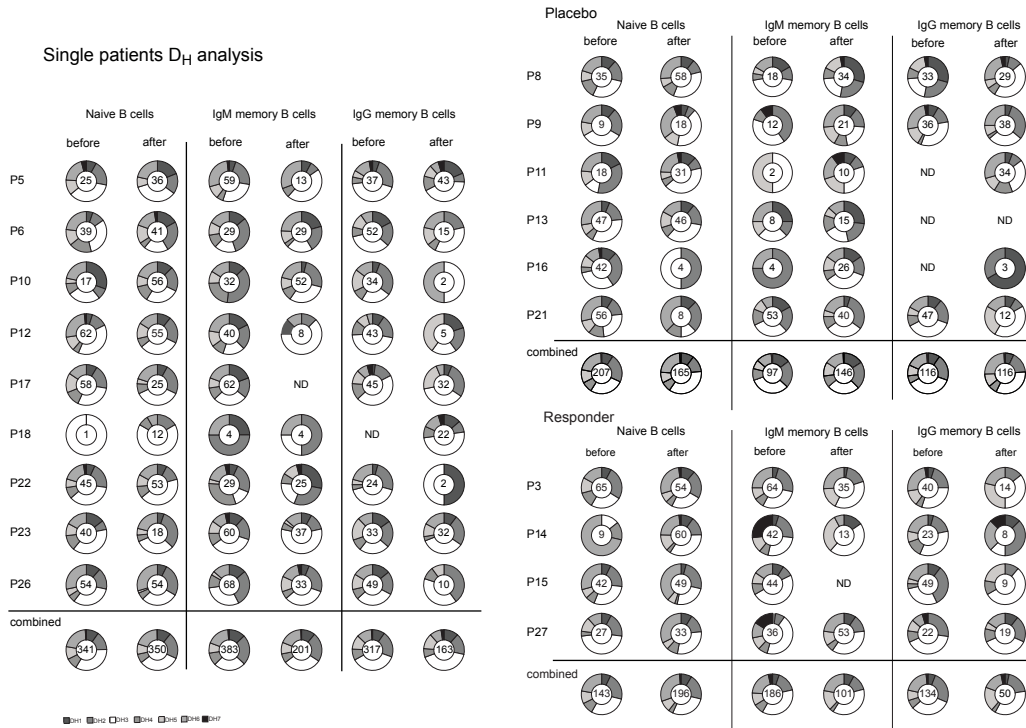

**Supplementary Figure 4.** IgH chain joining (J) regions repertoires in single cell sorted CD19<sup>+</sup>CD27<sup>+</sup>IgM<sup>+</sup>, CD19<sup>+</sup>CD27<sup>+</sup>IgM<sup>+</sup> and CD19<sup>+</sup>CD27<sup>+</sup>IgG<sup>+</sup> B cells, respectively. Samples were analyzed before and 12 months after rituximab and placebo (normal saline solution) therapy. Clonally expanded sequences were counted as one sequence. The numbers in circles indicate the number of individual sequences per patient.

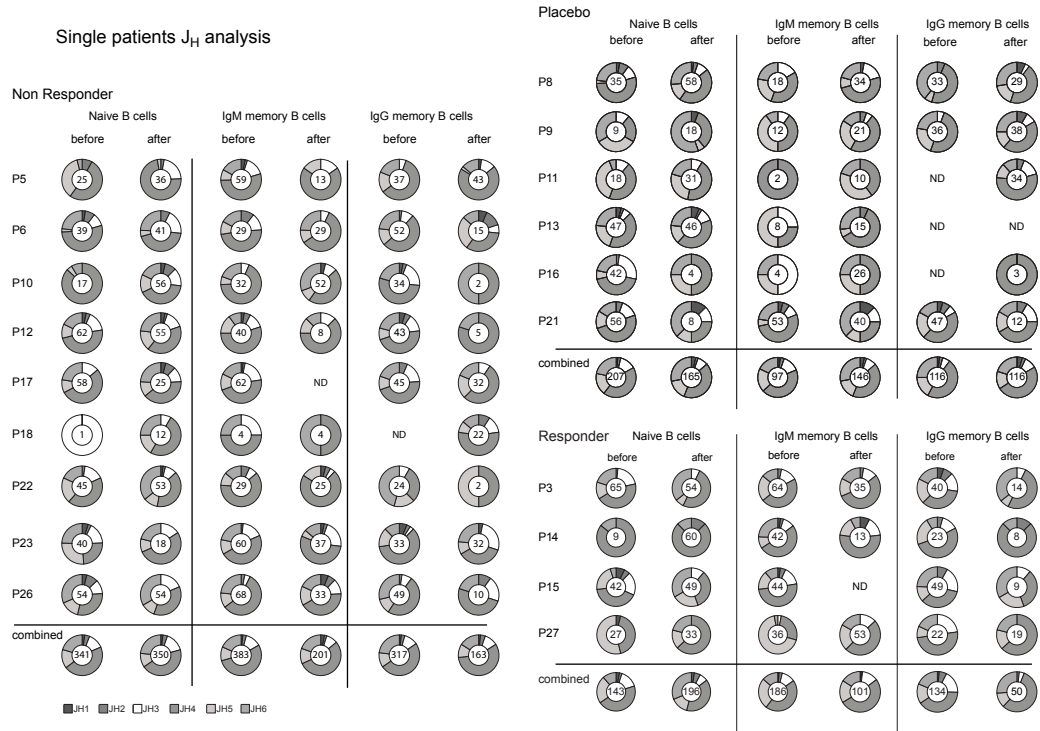

**Supplementary Table 1.** Frequency of expanded sequences in the memory compartment of all patients before and after therapy are depicted as frequency of expanded sequences divided by the total sequence count for each patient.

| Patient Subgroup | Patient | Memory compartment | Before Vs. after therapy | Frequency of exp. seq. (%) |
|------------------|---------|--------------------|--------------------------|----------------------------|
| Placebo          | P8      | IgM                | after                    | 7/45 (15.6%)               |
| Placebo          | P8      | IgM                | after                    | 2/45 (4.4%)                |
| Placebo          | P8      | IgM                | after                    | 2/45 (4.4%)                |
| Placebo          | P8      | IgM                | after                    | 2/45 (4.4%)                |
| Placebo          | P8      | IgM                | after                    | 2/45 (4.4%)                |
| Placebo          | P8      | IgM                | after                    | 2/45 (4.4%)                |
| Placebo          | P8      | IgM                | before                   | 12/31 (38.7%)              |
| Placebo          | P8      | IgM                | before                   | 3/31 (9.7%)                |
| Placebo          | P8      | IgG                | before                   | 2/37 (5.4%)                |
| Placebo          | P8      | IgG                | before                   | 3/37 (8.1%)                |
| Placebo          | P8      | IgG                | before                   | 2/37 (5.4%)                |
| Placebo          | P8      | IgG                | after                    | 3/31 (9.7%)                |
| Placebo          | P9      | IgM                | before                   | 31/43 (72.1%)              |
| Placebo          | P9      | IgM                | before                   | 2/43 (4.7%)                |
| Placebo          | P9      | IgM                | after                    | 45/67 (67.2%)              |
| Placebo          | P9      | IgM                | after                    | 3/67 (4.5%)                |
| Placebo          | P9      | IgG                | after                    | 20/60 (33.3%)              |
| Placebo          | P9      | IgG                | after                    | 2/60 (3.3%)                |
| Placebo          | P9      | IgG                | after                    | 2/60 (3.3%)                |
| Placebo          | P9      | IgG                | after                    | 2/60 (3.3%)                |
| Placebo          | P11     | IgM                | before                   | 12/13 (92.3%)              |
| Placebo          | P11     | IgM                | after                    | 8/24 (33.3%)               |
| Placebo          | P11     | IgM                | after                    | 4/24 (16.7%)               |

|               |     |     |        |               |
|---------------|-----|-----|--------|---------------|
| Placebo       | P11 | IgM | after  | 2/24 (8.3%)   |
| Placebo       | P11 | IgM | after  | 2/24 (8.3%)   |
| Placebo       | P13 | IgM | after  | 2/16 (12.5%)  |
| Placebo       | P16 | IgM | after  | 3/29 (10.3%)  |
| Placebo       | P16 | IgM | after  | 2/29 (6.9%)   |
| Placebo       | P21 | IgM | before | 4/57 (7.0%)   |
| Placebo       | P21 | IgM | before | 2/57 (3.5%)   |
| Responder     | P3  | IgM | after  | 2/37 (5.4%)   |
| Responder     | P3  | IgM | after  | 2/37 (5.4%)   |
| Responder     | P3  | IgG | after  | 3/16 (18.8%)  |
| Responder     | P14 | IgM | before | 6/49 (12.2%)  |
| Responder     | P14 | IgM | before | 2/49 (4.1%)   |
| Responder     | P14 | IgM | before | 2/49 (4.1%)   |
| Responder     | P14 | IgG | after  | 2/9 (22.2%)   |
| Responder     | P27 | IgM | before | 7/44 (15.9%)  |
| Responder     | P27 | IgM | before | 4/44 (9.1%)   |
| Non-responder | P5  | IgG | after  | 2/44 (4.5%)   |
| Non-responder | P5  | IgG | before | 2/38 (5.3%)   |
| Non-responder | P5  | IgM | after  | 5/20 (25%)    |
| Non-responder | P5  | IgM | after  | 4/20 (20%)    |
| Non-responder | P5  | IgM | after  | 4/20 (20%)    |
| Non-responder | P5  | IgM | before | 19/78 (24.4%) |
| Non-responder | P5  | IgM | before | 2/78 (2.6%)   |
| Non-responder | P6  | IgM | before | 2/32 (6.3%)   |
| Non-responder | P6  | IgM | before | 2/32 (6.3%)   |
| Non-responder | P6  | IgM | before | 2/32 (6.3%)   |

|               |     |     |        |               |
|---------------|-----|-----|--------|---------------|
| Non-responder | P6  | IgM | after  | 3/31 (9.7%)   |
| Non-responder | P10 | IgG | before | 2/35 (5.7%)   |
| Non-responder | P10 | IgM | after  | 2/53 (3.8%)   |
| Non-responder | P10 | IgM | before | 3/58 (5.2%)   |
| Non-responder | P10 | IgM | before | 2/58 (3.4%)   |
| Non-responder | P10 | IgM | before | 24/58 (41.4%) |
| Non-responder | P12 | IgM | before | 3/43 (7.0%)   |
| Non-responder | P12 | IgM | before | 2/43 (4.7%)   |
| Non-responder | P17 | IgM | before | 2/74 (2.7%)   |
| Non-responder | P17 | IgM | before | 2/74 (2.7%)   |
| Non-responder | P17 | IgM | before | 10/74 (13.5%) |
| Non-responder | P17 | IgM | before | 2/74 (2.7%)   |
| Non-responder | P17 | IgG | after  | 2/33 (6.1%)   |
| Non-responder | P18 | IgG | after  | 2/23 (8.7%)   |
| Non-responder | P22 | IgG | after  | 2/3 (66.7%)   |
| Non-responder | P22 | IgM | before | 2/30 (6.7%)   |
| Non-responder | P22 | IgM | after  | 2/25 (8.0%)   |
| Non-responder | P23 | IgM | after  | 6/43 (14.0%)  |
| Non-responder | P23 | IgM | after  | 2/43 (4.7%)   |
| Non-responder | P23 | IgM | before | 2/64 (3.1%)   |
| Non-responder | P23 | IgM | before | 2/64 (3.1%)   |
| Non-responder | P23 | IgM | before | 2/64 (3.1%)   |
| Non-responder | P23 | IgM | before | 2/64 (3.1%)   |
| Non-responder | P23 | IgM | before | 1/64 (1.5%)   |
| Non-responder | P26 | IgM | after  | 4/38 (10.5%)  |
| Non-responder | P26 | IgM | after  | 2/38 (5.3%)   |

|               |     |     |       |             |
|---------------|-----|-----|-------|-------------|
| Non-responder | P26 | IgM | after | 2/38 (5.3%) |
|---------------|-----|-----|-------|-------------|



**Supplementary Table 2.** Individual VH, DH, JH sequences and mutations in IgM memory B cells of patient 27 before therapy.

| Frequency of seq. (%) | V-gene allele      | J-gene allele   | D-gene allele      | FWR1 length bp | FWR1 mutations | CDR1 length bp | CDR1 mutations | FWR2 length bp | FWR2 mutations | CDR2 length bp | CDR2 mutations | FWR3 length bp | FWR3 mutations | Sequence                                                                                                                                                                                                                                                                                                                                                                                                                                       |
|-----------------------|--------------------|-----------------|--------------------|----------------|----------------|----------------|----------------|----------------|----------------|----------------|----------------|----------------|----------------|------------------------------------------------------------------------------------------------------------------------------------------------------------------------------------------------------------------------------------------------------------------------------------------------------------------------------------------------------------------------------------------------------------------------------------------------|
| 1/45 (2.2%)           | <i>IGHV3-7*01</i>  | <i>IGHJ5*01</i> | <i>IGHD4-23*01</i> | 75             | 8              | 24             | 5              | 51             | 3              | 24             | 4              | 73             | 14             | tacaggtgccatccagtagcagcttaagglltcccaltgtagggtaggtgagttgagggatcggggga<br>ggattggcccagcctgggggtccttgagactctcctgtaggctcgtgattcagctcaglaatttttg<br>gatgacclgggtccgcccaggtccaagggaaagggctggatgggtggcccaatcaagcaagcaagtg<br>gaagtgagcagttattcctggactctgtaaggccogattcaactctccagagacaaccaaga<br>actcactatctgcaaatgagagccctgagcccgacagacaaggcttattactctgtagcagact<br>ccggagggctgtagcaggtgggtgattctggggcccagggaaacctggtcaccgtctctcag<br>ggaggcctcccccccc |
| 1/45 (2.2%)           | <i>IGHV3-74*01</i> | <i>IGHJ4*02</i> | <i>IGHD3-22*01</i> | 75             | 1              | 24             | 2              | 51             | 7              | 24             | 5              | 114            | 9              | ctttaagggtcccaagtgtaggtgtagcctggagtcgggggagccttagttcagcctgggggt<br>ccctggactctctgcaacctgtagttaccctcagtaattactggtagcactgtagcccaaggt<br>ccaagggaagggtctgggtctgtagttaaactctgtagggagtaagtcagactcagcagcag<br>tcagtgaaggccgattccaactctccagacaaccccaagacagctgctgcaaaatgaac<br>agctgaagcccaagacacgctgtttattttgtagtagtctgtagcagctcagcagcagctt<br>ggggccaggaacctgtcaccgtctcctcagagggtctcccccccc                                                          |
| 1/45 (2.2%)           | <i>IGHV1-58*01</i> | <i>IGHJ5*02</i> | <i>IGHD3-10*01</i> | 75             | 3              | 24             | 0              | 51             | 0              | 24             | 0              | 114            | 0              | tacaggtgccactccaggtgtagctgtagcctgtagctggcctgagtgagaagcctgggacct<br>aglaaagttcctgcaagctctgattaccctactgactctctgtagcaggtggtagcagagct<br>cgtggacaacgcctgagtagalagtaggtctgtgtgcaagtgtaacacaactcagcagcag<br>aagttccaggaagagttaccattaccaggacaagttcccaagacaagcctcatgtagctgag<br>cagcctgagatccgagacacggccgtgtaactctgtagcaggttctcccgcttgggtctcagg<br>gagttataacggaccacaatgactgtagccctggggccaggaaacctgttaccctctctc<br>agggggtcccccaatt                    |
| 1/45 (2.2%)           | <i>IGHV3-7*01</i>  | <i>IGHJ5*02</i> | <i>IGHD2-21*02</i> | 75             | 12             | 24             | 7              | 51             | 6              | 24             | 6              | 114            | 37             | tgccactcccaggtgcatagtaaggtagctgtagctgtagcagctgtagctgtagcaggtgaggt<br>cgttccagccgggggtgcttcaagacttctagttcagcctctgtagttcagttcttttggatgac<br>ctgggtccgctgctccaagaaaggggtcagtagtggggcccaatgagaaggaagggaagcgt<br>gagagattcacttctggggaaggccacaatcaacactcagagacaacacagcaacaagct<br>gactgatcaaaatgaacagctgtagctgtagcagcagctgtagttatgggggtggggagtagtca<br>ggggggggcccaaggactttagctctggggccagggaaacctgtcaccgtctcctcagagg<br>agggtcccccccc                |
| 7/45 (9.3%)           | <i>IGHV3-7*01</i>  | <i>IGHJ4*02</i> | <i>IGHD6-13*01</i> | 75             | 3              | 24             | 8              | 51             | 5              | 24             | 4              | 114            | 12             | gcttaagggtcccaagtgtaggtgtagctgtagctgtagcagctgtagcaggtgtagcagctgtagg<br>tccctgagactcctctgtagcctgctccttaataactactgtagttagttagctgtagcagct<br>ccagggaagggtgtaggtgggtccagcacaagaagaagtagtagagtagtagtagtagtagtgg<br>actctgtaggggtgtagcctcctcagagacaacccaagtagttagctcttctgcaactgtagc<br>agcctgagcggcgaagacacgctgtagtatttagttagcagactccggatgggtcggccgggtgac<br>ttgattctgggcccagggaacctgtgaccgtctcctcaggggggtcccccccc                                   |
| 1/45 (2.2%)           | <i>IGHV3-7*01</i>  | <i>IGHJ4*02</i> | <i>IGHD6-13*01</i> | 75             | 5              | 24             | 8              | 51             | 7              | 24             | 4              | 114            | 14             | caggtgccactcccaagtgtagctgtaggtgtagcagctgtagcaggtgtagcagctgtagg<br>gaggtgtagcagcctgggggtcctgtagactcctcctgtagcctgtagcagcctccttaatactta<br>ctgtagttagtgggtcctcaggtccangaaagggctgtagtggggccagcacaagaagaag<br>atgaagtagaagttcctgtagcctgtaggggtgtagcctcctcagagacaaccca<br>agagttcctctcgaactgaacaacctgtagcggcgtgtagcagctgtagtatttagttagcagac<br>tccgaagggtcggccgggtggctttagctgtagggccagggaacctgttaccgtctcctcag<br>agggtcccccaact                      |
| 1/45 (2.2%)           | <i>IGHV1-58*01</i> | <i>IGHJ5*02</i> | <i>IGHD3-10*01</i> | 75             | 56             | 24             | 1              | 51             | 1              | 24             | 0              | 114            | 13             | acaggtgccatcccaaggtgtagctgtagcctgtaggtgagaagcctgggacctcag<br>tgaagttctcgaagggtgggattcacttactgtagctgtagcagtgtaggtgtagcagagctcag<br>tggacaacgcctgtagtagtagtagctgtagctgtagcagtgtagtaacacaagtagtagcacaaga<br>gttccaggaagagtagcacttaccagggcagggcccaagacacagctgtagtatttagttagcagac<br>cagcagtagtagcagagaccgctctattctgtagcagtagtctcccgctcatgggttccg<br>gagttatataagcggagccaatgtagcttagaccctggggccagggaaacctgttaccgttccg<br>ctcaggaagggtcccccccc       |



|                |             |           |             |    |    |    |    |    |    |    |    |     |    |                                                                                                                                                                                                                                                                                                                                                                                                                                    |                                                                                                                                                     |
|----------------|-------------|-----------|-------------|----|----|----|----|----|----|----|----|-----|----|------------------------------------------------------------------------------------------------------------------------------------------------------------------------------------------------------------------------------------------------------------------------------------------------------------------------------------------------------------------------------------------------------------------------------------|-----------------------------------------------------------------------------------------------------------------------------------------------------|
|                |             |           |             |    |    |    |    |    |    |    |    |     |    |                                                                                                                                                                                                                                                                                                                                                                                                                                    | agttccagaaagatcaccattaccaggacatgcccaagcacagcctacatgacatgac<br>agctatatacggaccacccaatggaactcgcacccctggcagggaacccctgacccgtctcca<br>ggggagcatccccccccc |
| 1/45<br>(2.2%) | IGHV3-7*01  | IGHJ5*01, | IGHD3-16*01 | 75 | 3  | 24 | 8  | 51 | 5  | 24 | 4  | 110 | 14 | tgtaaggtgtccantgtgaggtgacagctgagctgctggggaggctgtgccaagctgggggtc<br>cctgagacctctgtgctggctgctgctcttaatactctgactgactggctgctgagctc<br>cagggaagggtctgagtgctgctgcccagcatcaagaagatgaagtgagaagctatgtgga<br>ctctgtgaggggcccattcaccatctccagagacaacccaagattgctctccaactgaaca<br>gctgagcgggatgacacggctgtgattattgctgagactcggagctgggctgctggcgggtgtt<br>attctggggcagggaacccctgctcaccgtctctcaggaggctccccccccc                                       |                                                                                                                                                     |
| 1/45<br>(2.2%) | IGHV3-7*01  | IGHJ4*02  | IGHD6-13*01 | 75 | 4  | 24 | 8  | 51 | 6  | 24 | 4  | 114 | 13 | tacaggtgccactccaggtgcagctgttaaggtgtccaggtgaggtgcagatgtggagtctggg<br>ggaggctgtgccaagcctgggggtccctgagactctctgtgctggctgctgctcttaatact<br>actggtgactgtgctgctgagctcagggtccagggaagggtccagagtggtggtgccaagaaa<br>gatgaagtgagaagctctatgtgactctgctgaggggcattcaccatctccagagacaagcc<br>aagattgctctcttctgcaactgaacagcctgagcggcgatgacacatccatctccagagaca<br>ctcggatggctgctggctgtgattactgggcccagggaacccctgctcctccagg<br>gaaggccccccccccc          |                                                                                                                                                     |
| 1/45<br>(2.2%) | IGHV1-58*01 | IGHJ5*02  | IGHD3-10*01 | 75 | 56 | 24 | 14 | 51 | 1  | 24 | 2  | 114 | 14 | cctacagggggccatccaggtgcagctgtgacagctgcaactgaggtgaagaagcctgggacc<br>tcagtgaagctctctgcaagcctctgattcagactcagctgctgctgctgctgctgctgctgca<br>ctctgtgacaacccctgagtgatgagatgcatctgctgctggcagagtaacacaagctcagc<br>agaagttccaggaagagtcaccattaccaggacatgctcagctcagctcagagacaagcc<br>gagcaagatgagatccagagacaagcggcagctattcagctgctgctgctgctgctgctgctg<br>ctgggagtgatgaagcgaacgaatgactgctgctgctgctgctgctgctgctgctgctgctg<br>ctccaggagccccccccccc |                                                                                                                                                     |
| 1/45<br>(2.2%) | IGHV1-58*01 | IGHJ5*02  | IGHD3-10*01 | 75 | 10 | 24 | 1  | 51 | 1  | 24 | 3  | 114 | 6  | tacaggtgccactccaggtgcagctgtgacagctgcaactgaggtgaagaatcctgggacctca<br>gtgaagtttccctcagcctctgattcactctgactgctgctgctgctgctgctgctgctgctg<br>gtggaacagcctgagtgatgagatgcatctgctgctgctgctgctgctgctgctgctgctg<br>aagttccaggaagagtcaccattaccaggacatgctcagctcagctcagagacaagcc<br>cagctgagatccagagacaagctgctgctgctgctgctgctgctgctgctgctgctgctg<br>ggagtataacggagcaatgactgctgctgctgctgctgctgctgctgctgctgctgctg<br>caggaggctccccccccccc          |                                                                                                                                                     |
| 1/45<br>(2.2%) | IGHV3-7*01  | IGHJ4*02  | IGHD3-3*01  | 75 | 5  | 24 | 9  | 51 | 6  | 24 | 4  | 114 | 13 | tacaggtgccactccaggtgcagctgtgacagctgcaactgaggtgaagaatcctgggacctca<br>gtgaagtttccctcagcctctgattcactctgactgctgctgctgctgctgctgctgctgctg<br>gtggaacagcctgagtgatgagatgcatctgctgctgctgctgctgctgctgctgctgctg<br>aagttccaggaagagtcaccattaccaggacatgctcagctcagctcagagacaagcc<br>cagctgagatccagagacaagctgctgctgctgctgctgctgctgctgctgctgctgctg<br>ggagtataacggagcaatgactgctgctgctgctgctgctgctgctgctgctgctgctg<br>caggaggctccccccccccc          |                                                                                                                                                     |
| 1/45<br>(2.2%) | IGHV3-7*01  | IGHJ5*02  | IGHD3-16*01 | 75 | 56 | 24 | 19 | 51 | 13 | 24 | 4  | 114 | 39 | ctacaggtgccactccaggtgcagctgtgacagcttccaggaagggaacaaatctgtagtctcag<br>gaagctgtgctcagcctggggggattgagactctgctgctgctgctgctgctgctgctgctg<br>agtgaaagcgggctcctgcaagcctcctggaagggtccggagtgagctccagacaagaaa<br>gtgaaagtgagaagctcatalgtgagctgctgctgctgctgctgctgctgctgctgctgctg<br>aagattctctgagggaccagctgaaacactgagcggcctgagctcctccctgctgctgctg<br>actccggaaagcggctgcaagggaggttgaattcctggggcccagggaacccctgctccttcc<br>taagggaaggccccccccccc |                                                                                                                                                     |
| 1/45<br>(2.2%) | IGHV3-7*01  | IGHJ5*01, | IGHD5-12*01 | 75 | 42 | 24 | 18 | 51 | 33 | 24 | 13 | 114 | 28 | gtaattaaaggttccaggtgaggtgacagctatggagctgctggggaggcctgtgctcagcctggggg<br>gtccctgagactctctgctgctgggtccccctctcttaatactctgagatgactgctgctgctg<br>tccagggagggtctgagtgctgctgctgctgctgctgctgctgctgctgctgctgctgctg<br>taagtgagggtgctgctgctgctgctgctgctgctgctgctgctgctgctgctgctgctg<br>aacatgagcggatgacacggctgtgattgtgctgagactcggatgctgctgctgctgctg<br>tgattactggggcagggaacccctgctcctcctcaggaggctccccccccc                                   |                                                                                                                                                     |
| 1/45<br>(2.2%) | IGHV1-58*01 | IGHJ5*02  | IGHD3-10*01 | 75 | 50 | 24 | 19 | 51 | 31 | 24 | 8  | 114 | 46 | tacaggtgccactccaggtgcagctgtgacagctgcaactgaggtgaagaatcctgggacctcag<br>gaagctcccccaagggggattcagactctctgctgctgctgctgctgctgctgctgctgctg<br>ggcaaacgctgagtgatgagctccatggaaggtgcccaggtgtaacgcaagctcagcagag<br>altaaggaagagctcattaccagggaagggcaccattcaccatccagagacaagagc<br>agctgagatctgagagaccagcaactcactgaggtgctgctgctgctgctgctgctgctg<br>gggggtcagaaggggtgctgcaagggattgaccctggggcccagggaacccctgtgctc<br>cgtttccagggaaggccccccccccc     |                                                                                                                                                     |
| 1/45<br>(2.2%) | IGHV3-7*01  | IGHJ5*01  | IGHD3-16*01 | 75 | 9  | 24 | 10 | 51 | 10 | 24 | 9  | 106 | 72 | tacaggtgccactccaggtgcagctgtgacagctgcaactgaggtgaagaatcctgggacctcag<br>ggaggctgtgctcagctgaggggtctgagactctgctgctgctgctgctgctgctgctgctg<br>tactgagatgctgctgctgctgctgctgctgctgctgctgctgctgctgctgctgctg<br>agatgaaglaagaagctctgactgactgctgctgctgctgctgctgctgctgctgctgctg<br>caagagatctcttaccagcgaacactgagcggcagacagcggctgtattatggga<br>gagctcgaaggggtgctgcaaggggtgtgactcctggggcccagggaacccctgtgctcctct<br>caggagctcccccaacc              |                                                                                                                                                     |
| 1/45<br>(2.2%) | IGHV4-39*05 | IGHJ5*02  | IGHD6-13*01 | 75 | 31 | 30 | 21 | 51 | 6  | 21 | 1  | 114 | 5  | tattacaggtgccactccaggtccaactgtgctgctgctgctgctgctgctgctgctgctg<br>tcaactgagatctctgcaagcctgggtaccactcactgctgctgctgctgctgctgctgctg<br>gtagctgagacagggcgggagcggcagccagccagggaagggtgaggtgctgctgctgctg<br>tattatggggaccaccactcaacccctcctcaagagctgagccaccatctcctgagcagctc<br>caagaaccagttctcctgaggtgactgctgctgctgctgctgctgctgctgctgctgctgctg                                                                                              |                                                                                                                                                     |

|                |             |          |             |    |    |    |    |    |    |    |   |     |    |                                                                                                                                                                                                                                                                                                                                                                                                                            |                                                                                    |
|----------------|-------------|----------|-------------|----|----|----|----|----|----|----|---|-----|----|----------------------------------------------------------------------------------------------------------------------------------------------------------------------------------------------------------------------------------------------------------------------------------------------------------------------------------------------------------------------------------------------------------------------------|------------------------------------------------------------------------------------|
|                |             |          |             |    |    |    |    |    |    |    |   |     |    |                                                                                                                                                                                                                                                                                                                                                                                                                            | agaacagaagtcgtctacaactggtcgaccctggggccgggaacctgtgacgctctctcc<br>tcgggggatccccccatc |
| 1/45<br>(2.2%) | IGHV3-7*01  | IGHJ5*02 | IGHD2-15*01 | 75 | 57 | 24 | 20 | 51 | 15 | 24 | 6 | 114 | 48 | actcagggtccatcccaagtcagcttcaagtcactgaggggacaaaactgaggatctca<br>ggaaggtctccagctgggggggattgagactctactcggggtcagctgctccgacaatc<br>gtgacaacgccgggtctcagagctcatggaaggggccagagtgggcacaacgacataca<br>aagatgaaglaaagctcatgtgacaggggacaggggacattccatctccagagacaa<br>gagcaagagatctcgaggaaccagccgaacantgagcggcgagagctgctgctgattatt<br>tcgaagctccgaagggtgcgcacgggaggtctgactctgggcccagggaacctgtgca<br>ccgttctccaggaggccctccccccacc       |                                                                                    |
| 1/45<br>(2.2%) | IGHV1-58*01 | IGHJ5*02 | IGHD3-10*01 | 75 | 19 | 24 | 10 | 51 | 5  | 24 | 6 | 103 | 31 | ttacaggtcccatcccaagtcagcttcaagtggtccctggggggaagagctgggatctca<br>gtgaaggtttgtcccaagctggggttcagactatagctcggggtcagtggttcgacagta<br>tcgtggaacaacgctggatgagatgcatggaagtggtcagagtgaaacaaagatccac<br>agaagttccagaaagagtcaccattaccagggacagggcaccattccatctccagagaca<br>gagcaaaagagatctcgaggaacaggtctactgagtgccgagatcggcctgtgagg<br>gttcgggactcagaaggggcgcgggacttgaccctggggccgggaacctgtgaccc<br>gttctccaggaggccccccccccccc           |                                                                                    |
| 1/45<br>(2.2%) | IGHV1-58*01 | IGHJ5*02 | IGHD3-10*01 | 75 | 35 | 24 | 15 | 51 | 18 | 24 | 9 | 114 | 46 | tacaggtcccatcccaagtcagcttcaagtggtccctggggggaagagctgggatctca<br>ggggaaggtgttccagctggggggttgaagctctcatgtcgggctcagtggttcgaca<br>gtacttaggggaacgctgggtccgtcaggtcatggaaggccagagtgacacacagatc<br>aacaagatgaagaaagagtcaccattaccagggacagggcaccattccatctccagaga<br>caagagcaagagatctcgaggaaccagccgaacactagagtgccgagatctcccggtga<br>tggggtcggggagtcggaagcgtgcaaggggtcgaacctggggccagggaacctgtgaccc<br>caccgtctccaggaggctcccccaacc      |                                                                                    |
| 1/45<br>(2.2%) | IGHV4-39*01 | IGHJ3*02 | IGHD4-17*01 | 75 | 3  | 30 | 5  | 51 | 0  | 21 | 1 | 114 | 3  | gcaattctcacagcgacgacccagatgctctgtgacaggtgagctgagagtggtggccc<br>aggactgtgaagccttcggaaccctgtccctcaactgctctcagtggtccctcaacagtg<br>gtagttactctgggctgagctccagccccaggggaggggctgagtgattgggagatctat<br>tatagtgggaaccgactacaaccgtcccaagctgagtcagtcacatgacagctgatactg<br>aagaaccagttctccctgaagctgagctgtgaccgcccagacaacggctgtgattactgtgag<br>acgtacgtgactcttatgattgtatctgggccaagggaacatgctaccgtctcaggg<br>aggatccccccccccc            |                                                                                    |
| 1/45<br>(2.2%) | IGHV3-7*01  | IGHJ4*02 | IGHD3-16*01 | 75 | 14 | 24 | 16 | 51 | 13 | 24 | 9 | 106 | 70 | ctacagggtccatcccaagtcagcttcaaggttccactgtaagggaacaaactgtagctg<br>ggggaggtgtgctcagcctgggggggactgagactctatgctgagggctcagcgggtcttcaa<br>tctctgggacaacgctgggtccgataggtctcatggaagggccagagtgggcggccagatca<br>agaaagatgaagggaagatcatgltggtgaggtcagggccgagatccatctccagagaca<br>acggcaagattctcttccctcagcaacactgagcggcgcagacaacggctgtgattatggg<br>agactccggaagggtgctccgggaggttattcctggggcagggaacctgtgacctgtctcc<br>caggggatccccccccccc |                                                                                    |
| 1/45<br>(2.2%) | IGHV3-7*01  | IGHJ4*02 | IGHD5-12*01 | 75 | 5  | 24 | 10 | 51 | 32 | 24 | 3 | 113 | 45 | tacaggtcccatcccaagtcagcttcaaggttccactgtaagggtgagctggtgagctgggg<br>agggctcagctcagctggggggtgagactctctgtagcctctgagttcaattcagcttattg<br>gatgactgtgctcagctcagcctgggaggggctgggtggggtgacaaatggaagagat<br>ggagtgagatactatgtgactgtgagagggccgattccatctccagagacaacccaag<br>attctctgatgacaaatgactgattgagtgtagcagacacgctgttattactggaaactcgc<br>gaggggtcagcaggggtacattgacctgtggccgggaacctggctaccctgccccgggg<br>ggccccccccccccccc         |                                                                                    |
| 1/45<br>(2.2%) | IGHV3-7*01  | IGHJ5*02 | IGHD6-13*01 | 75 | 5  | 24 | 11 | 51 | 6  | 24 | 4 | 114 | 16 | tagttaaggtgtccagtgagggcagctagtgagctgaggggagcctgtcagctgaggg<br>gtccctgagactctctgctgctgctcctgctcctgtaatttactgcatgactggctcagag<br>ctccagggaagggtgagtgaggggccagcaacaagaagatgaagtggaagctctatgt<br>ggactgtgaggggctcaccatctccagagacaacccagaggtctcttggcaacactgc<br>aacagctgagcggcagcagcagcgtgtgatttattgtccagacatccggatggctgcccgggt<br>ggcttattctggggccagggaacctgtgacctctccagggagcc                                                 |                                                                                    |
| 1/45<br>(2.2%) | IGHV1-58*01 | IGHJ5*02 | IGHD3-10*01 | 75 | 5  | 24 | 0  | 51 | 1  | 24 | 2 | 89  | 4  | tacaggtcccatcccaagtcagcttcaaggttccactgtaagggtgagctggtgagagctca<br>gtgaaggtctcctgcaaggtctgtgacttactgactctgctgagtggttcgacaggtc<br>gtgacaacgctgtgagtgatgagtgatctgagtgagtgagtgagtgagtgagtgagtgag<br>aagttccagaaagagtcaccattaccagggacatgctccagacaacccgctcactggagaga<br>cagcagatgagctcagagcagcagctgtattactgtgctggcagctgtccccctgtgggtctg<br>ggactattatacagggagcgaagggttaccctctggccagggaacctgtgacacctt<br>ctccagggaaggccc          |                                                                                    |





|                |             |          |             |    |   |    |   |    |   |    |   |     |   |                                                                                                                                                                                                                                                                                                                                                                                          |
|----------------|-------------|----------|-------------|----|---|----|---|----|---|----|---|-----|---|------------------------------------------------------------------------------------------------------------------------------------------------------------------------------------------------------------------------------------------------------------------------------------------------------------------------------------------------------------------------------------------|
| 1/52<br>(1.9%) | IGHV3-15*01 | IGHJ4*02 | IGHD1-26*01 | 75 | 3 | 24 | 1 | 51 | 0 | 30 | 0 | 114 | 2 | tcttaaggtgccagtgtaggtgcagctggaggagctctggggagggctgtgaaagcctgggggtccctgactctctgtagcctctggattcattcaaaagccctgtagctggtcccgagctccagggaggggctggagtggtggccgtttaaagaacaaactgtagtggggaacaagactacgctgcacccctgaaagccagattccacattcaagagatgattcaaaaacacgctgtatcga aalgaacagcctgaaacccagggacacagccgtgtattactgtaccacaggtatcgatgtgg agctatggacttggactctggggccagggaaacctgtgtccactctctcaag                  |
| 1/52<br>(1.9%) | IGHV4-39*01 | IGHJ4*02 | IGHD1-7*01  | 75 | 0 | 24 | 0 | 51 | 0 | 24 | 0 | 114 | 0 | tcccaatgggtctgtccaggtgcagctgcaggtgcagggccagggagctgtgaaagcctgga gacctctccctcactgctctgtgctccatcagcagtagtattactctgggtggatcgc ccagccccagggaggggctggagtggtgattggagtagtattatagtgggagcaactactac aacccctccctcaagagctgagctaccatctcgtagacagctcaagaacagcttccctgaagc ttagctctgtgaccgcccagacacggctgtattactgtcgagtcgaaatgctgagctacacta atccgctactggggccagggaaacctgtaccctctctcagagg                     |
| 1/52<br>(1.9%) | IGHV3-30*03 | IGHJ4*02 | IGHD2-15*01 | 75 | 0 | 24 | 0 | 51 | 0 | 21 | 0 | 114 | 0 | taaggttcccaggtgaggtgcagctgcaggtgtggggagggctgtgaaagcctgggagcttcc gtagactctctgtagcctcctgattcactcctcagtagctagctgtagctgtagctgtagctc agggcaagggctggagtggtggagtagtattatagtgaggagtaataactatgtagctc cgtgaaagggcattcaccatctccagagacaatccaagaacagctgtatctcaatgaacag cctgagagctgagggacagcgtgtattactgtcgaaatgctgagctacactaattgactact gggccagggaaacctgtgtccctcctca                                    |
| 1/52<br>(1.9%) | IGHV1-3*01  | IGHJ4*02 | IGHD2-2*01  | 75 | 1 | 30 | 0 | 51 | 0 | 24 | 0 | 114 | 0 | catcccaggtcaggtgtgtagctgtgggtgaggtgaaagcctggggcctcagtagattctc tagcaagctctctgtagcactcactactatctatattgtgctgcccagggccccggaca aa ggctgtagtgagtgagtggaacacagctggccaatgtagtggagcaataactcagctcag gacagattcaccattaccagggcctcagcagcagcagctctcaggtgtagcagctgagct ttagaacaagcctgtatattactgtgagagcattgtgacactcaactcaatgtctccggggct actggccagggaaacctgtgtaccctctctca                                  |
| 1/52<br>(1.9%) | IGHV4-39*01 | IGHJ4*02 | IGHD2-2*02  | 75 | 0 | 24 | 0 | 51 | 0 | 24 | 0 | 114 | 0 | gcctgtcccaggtgcagctgcaggtgcaggtgcagggccagggagctgtgaaagcctgggagccctgtccc taccctgtagctctctgtagctccatcagcagtagtattactctgggtggatcccgagcccc cagggaaagggctggagtggtggagtagtattatagtgaggagcaactcactacacagctc caagattcgagctaccatctcagtagacagctcaagaacagcttccctgtagctgtagctgt acccgccagacagcgtgtgtattactgtcgagaacacagctcagcttagtagtagtaccagctg ctatgtatcacttgcactctggggccagggaaacctgtgtaccctctctca |
| 1/52<br>(1.9%) | IGHV3-7*01  | IGHJ4*02 | IGHD5-12*01 | 75 | 0 | 24 | 0 | 51 | 0 | 24 | 0 | 114 | 0 | taaggttcccaggtgaggtgcagctgcaggtgtggagtggtggggagggctgtgaaagcctgggggtcc ctgagactctctgtagcctcctgattcactccttcttgaagtagctgtagctgtagctgtagctc agggaaagggcctggagtggtggccaacatgaaagagtaggaaagtaggaaagtagtattgtgtc tctgtgaaagggcagattcaccatctccagagacaacccaagactctctatctcaaatgaaca gcctgagcggcagcagcagcgtgtttattactgtgagagactcggaggggctgtagcgggtaca ttgactctggggccagggaaacctgtgtaccctctctcagggg   |
| 1/52<br>(1.9%) | IGHV4-4*02  | IGHJ3*02 | IGHD6-19*01 | 75 | 1 | 24 | 1 | 51 | 0 | 24 | 0 | 114 | 0 | cctgtcccaggtgcagctgcaggtgcaggtgcagggccagggagctgtgaaagcctggggacctctccct cactcctgctctctgtgtagcctcactcagcagtagtattactgtgagtggtcggagccccag ggaagggcctggagtggtgggaaatctcactatagtgaggagcaactcaactcaacccctccca agagtgagctaccatctcagtagaagccaagcagcttccctgaagctgtagctgtgtagcgc cggccggaacagcggctgtattactgtcgagaagggggcctagcagctgtagctgtagctctttt galactgtggggccagggaaacctgtgtaccctctctcagggg     |
| 1/52<br>(1.9%) | IGHV4-34*01 | IGHJ5*01 | IGHD3-22*01 | 75 | 1 | 24 | 0 | 51 | 0 | 24 | 0 | 114 | 0 | gccccaggtgtgtaggtgcagctgcagctgcaggtgcagggccagggagctgtgaaagcctgcca gacctctcctcactgctgtctatgtgtgtctcctcaggtttactactgtagctgtagctgtagc cccccagggagggcctggagtggtgggaaatcaatcactatagtgaggagcaactcaactcaac ccctcctcaagagctgagctaccatctcagtagacagctcaagaacagcttccctgaaagctgag ctctgtgaccgcccggcagcagcgtgtattactgtcgagtagtactgtagtagtagtattact gggccagcactctggggccagggaaacctgtgtaccctctctcaggg    |
| 1/52<br>(1.9%) | IGHV3-48*01 | IGHJ3*02 | IGHD6-6*01  | 75 | 2 | 24 | 0 | 51 | 1 | 24 | 8 | 114 | 0 | taaggttcccaggtgtaggtgcaggtgtggagtggtggggagggctgtgaaagcctggggagctc ttagactctctgtagcctcctgggttaccctggtgtctataattggcttgggtcccgctggcgc agggagggctggagtggtcttactatgtgttcaactgtgtcaactctgtagcactcaactacgc agagccgctgtagcctcctcagagacaatccaagggactcacttctcctcaaatgaatgagctc aagggccagggacaagcggctgtattactgtgtagagtagtgcgcccggggctgtgactgtgg gccaagggcaaacgctcctcaggg                            |
| 1/52<br>(1.9%) | IGHV3-9*01  | IGHJ4*02 | IGHD3-9*01  | 75 | 1 | 24 | 3 | 51 | 0 | 21 | 0 | 114 | 6 | taaggttcccaggtgtaggtgcagctgcaggtgtggggagggctgtgaaagcctggggagctc cctgagactctctgtagcctcctgattcactccttgaattgtagctgtagctgtagctgtagctc ccagggaaagggcctggagtggtctcagtagtattgtgaaatgtagtagtagtagtagtagtag ctgtgaaagggcagattcaccatctccagagacaacccaagaaacctcctgtatctgcaatgaaca gctgtagcgtgagggacagcggctgtattactgtgaaagctgtgtttgactgtgtgtgactgtg actgtggggccagggaaacctgtgtaccctctcagggg            |
| 1/52<br>(1.9%) | IGHV3-15*01 | IGHJ5*02 |             | 75 | 0 | 27 | 0 | 51 | 0 | 24 | 0 | 114 | 0 | taaggttcccaggtgtaggtgcagctgcaggtgtggggagggctgtgaaagcctgggggtcc cttgactctctgtagcctcctgattcactccttgaactgtagctgtagctgtagctgtagctc cagggaaagggcctggagtggtctcagtagtattgtgaaatgtagtagtagtagtagtagtag ctgtgaaagggcagattcaccatctcagagacaacccaagaaacctcctgtatctgcaatgaaca atgaacagcctgaaacccagggacacagcggctgtattactgtgaaagctgtgtttgactgtgtg actgtggggccagggaaacctgtgtaccctctcagggg                |







|                |                    |                 |                    |    |   |    |   |    |   |    |   |     |   |                                                                                                                                                                                                                                                                                                                                                                                                  |
|----------------|--------------------|-----------------|--------------------|----|---|----|---|----|---|----|---|-----|---|--------------------------------------------------------------------------------------------------------------------------------------------------------------------------------------------------------------------------------------------------------------------------------------------------------------------------------------------------------------------------------------------------|
| 1/52<br>(1.9%) | <i>IGHV3-30*03</i> | <i>IGHJ3*02</i> | <i>IGHD3-22*01</i> | 75 | 0 | 30 | 0 | 51 | 0 | 21 | 0 | 114 | 0 | ttaagggtccagtgtgaggtgcagctggaggctctggggaggcgtggtccagcctggaggtcc<br>ctgagactcctgtgcagcctctgattcaccttcagtagctatggcatgcactgggtccgaggctc<br>caggcaaggggctggagtggtggcagttatcatatgatggaagtaataactatgcagactc<br>cgtgaagggccgattcacctctcagagacaattccaagaacacgctglatctgcaaatgaacag<br>cctgagagctgaggacacggctgttactctgcgaaagctacgtattactatgatagtagtctgg<br>ggctttgatctggggccaagggacaatgtcaccgtctctcaggaggc |
|----------------|--------------------|-----------------|--------------------|----|---|----|---|----|---|----|---|-----|---|--------------------------------------------------------------------------------------------------------------------------------------------------------------------------------------------------------------------------------------------------------------------------------------------------------------------------------------------------------------------------------------------------|
